# Supplementary material
Source: PubMed Central journal article supplement (PMC6495143)

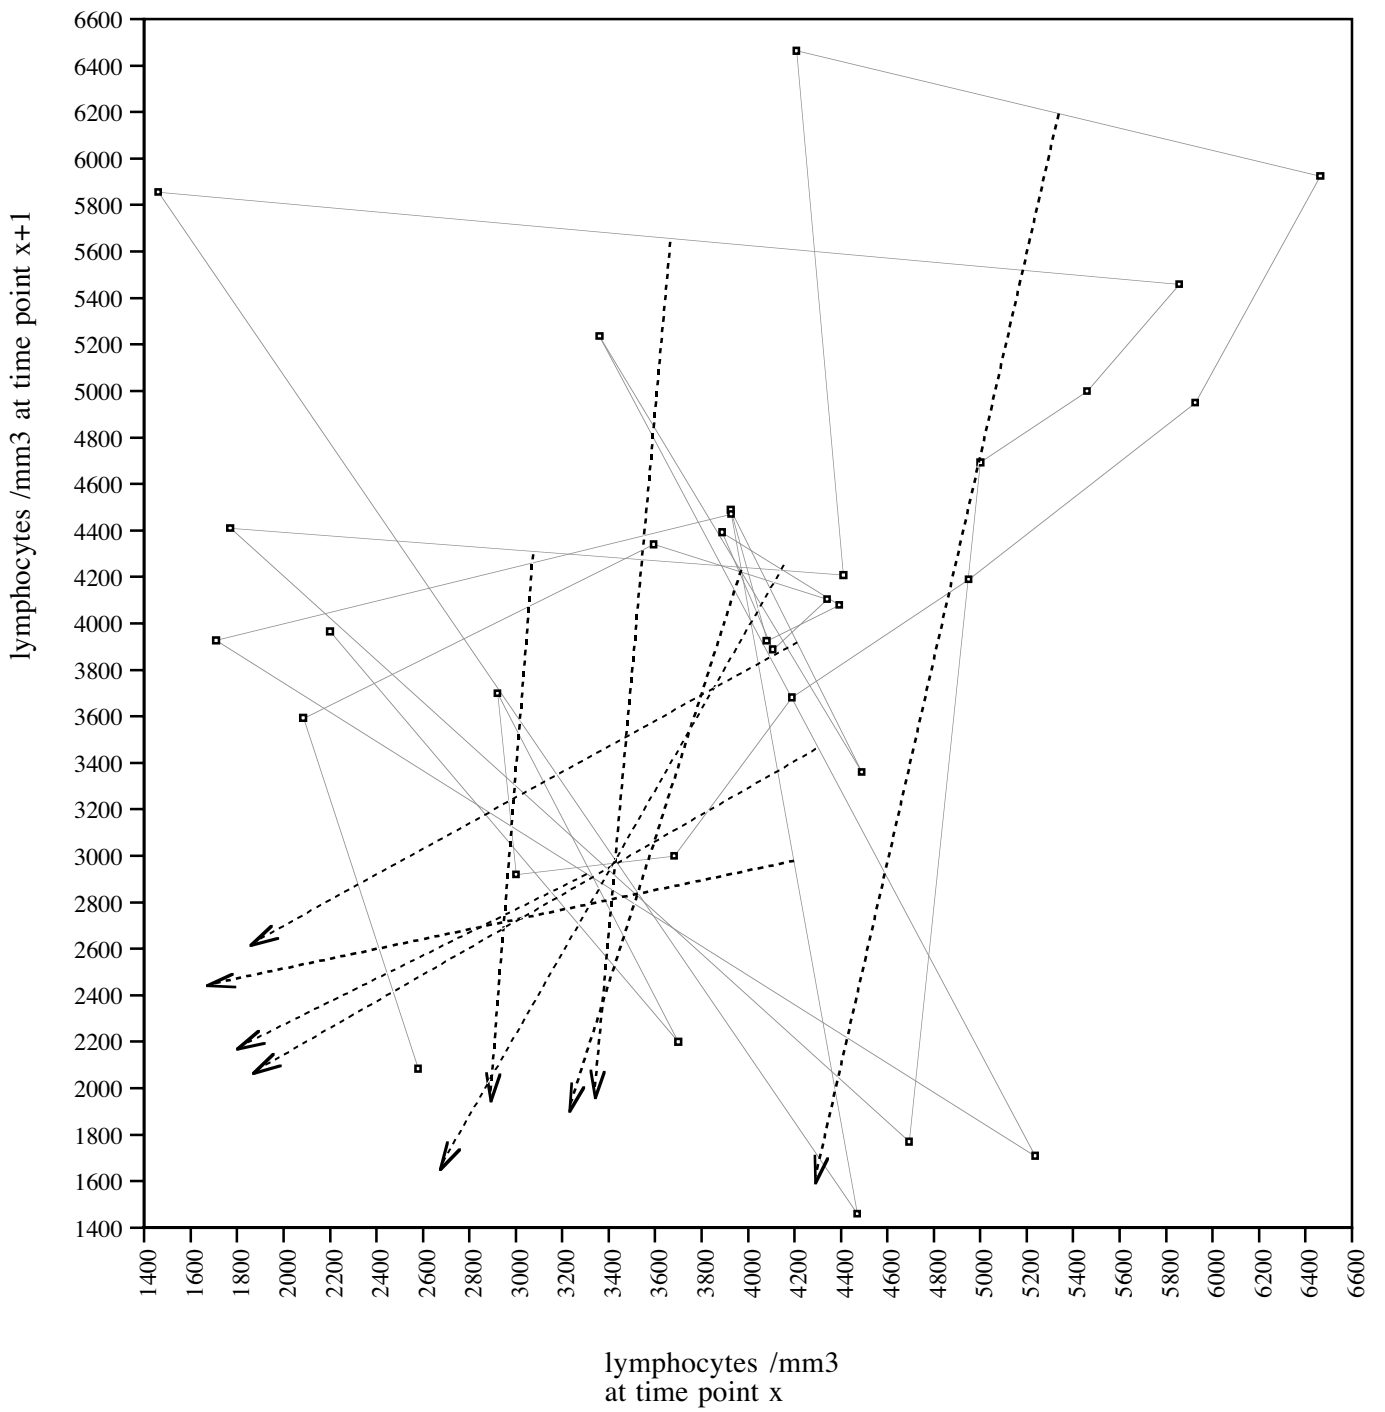

FIGURE 3 A

Supplement: CPR-43-326-s004.pdf [file CPR-43-326-s004.pdf]

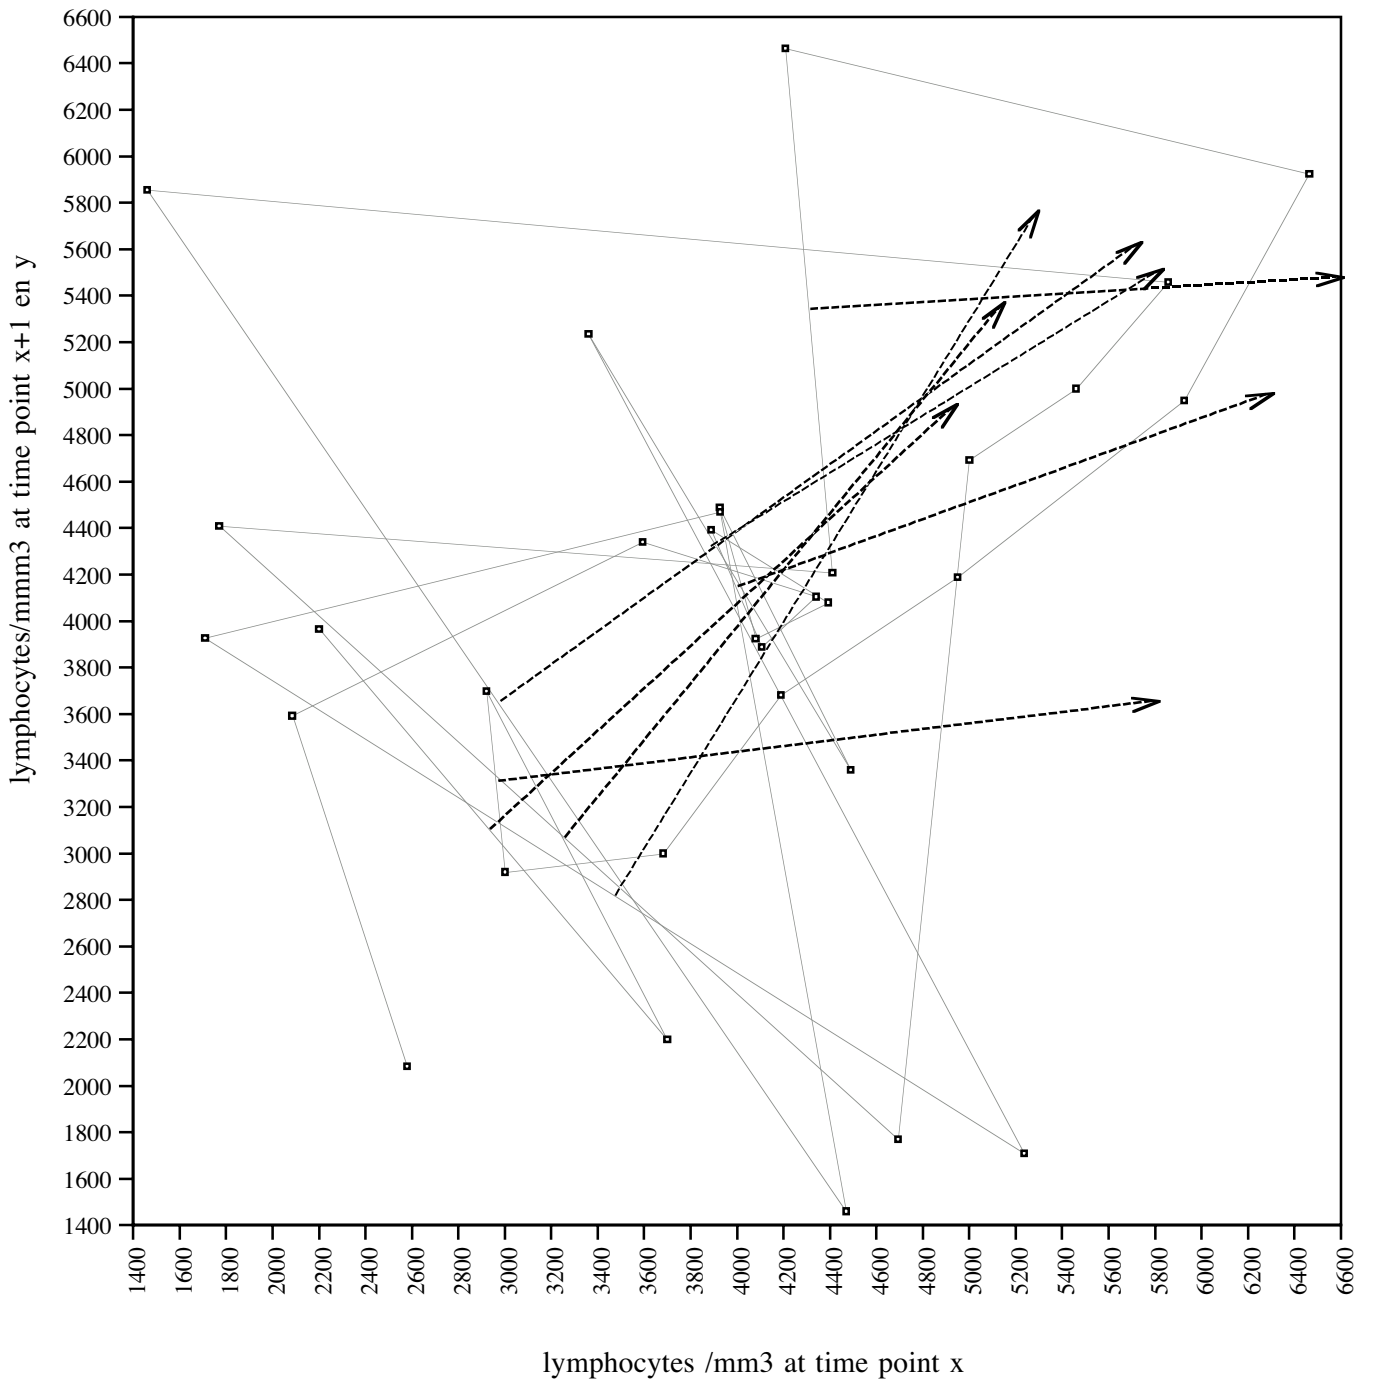

FIGURE 3 B

Supplement: CPR-43-326-s005.pdf [file CPR-43-326-s005.pdf]
